# Supplementary material for: Primary Care Pathway for Childhood Asthma: Protocol for a Randomized Cluster-Controlled Trial
Source: PubMed Central journal article supplement (PMC4804104; doi:10.2196/resprot.5261), 2016-03-08
Supplement: resprot_v5i1e37_app1.pdf [file resprot_v5i1e37_app1.pdf]

The minimum projected sample size represents the number of primary practices required if:

- 1) the average number of children evaluated per year with asthma in a practice is the same;
- 2) the intercluster correlation coefficient is smaller than anticipated;
- 3) the baseline proportion of children treated with preventer medications is significantly worse than expected; and
- 4) we assume the minimum clinically important difference is bigger than 15%.

The maximum projected sample size represents the number of primary practices required if:

- 1) average number of children evaluated per year with asthma in a practice is the same;
- 2) intercluster correlation coefficient is larger than anticipated;
- 3) the baseline proportion of children treated with preventer is significantly better than expected; and
- 4) we assume the minimum clinically important difference is smaller than 15%.

|                                                | <b>Minimum</b> | <b>Maximum</b> |
|------------------------------------------------|----------------|----------------|
| <b>Cluster Size</b>                            | <b>70</b>      | <b>70</b>      |
| <b>ICC</b>                                     | <b>0.02</b>    | <b>0.03</b>    |
| <b>Baseline % treated</b>                      | <b>0.10</b>    | <b>.50</b>     |
| <b>Minimal Clinically Important Difference</b> | <b>0.20</b>    | <b>.10</b>     |
| <b>Number of Clusters Required</b>             | <b>14</b>      | <b>44</b>      |

**Sample size calculation:** To calculate our sample size using our primary outcome - proportion of symptomatic asthmatic children in the baseline and follow-up periods that are appropriately treated with a preventer - we used data from all Alberta primary care practices that use *Med Access* as their EMR. The median number of children (< 18 yrs) with asthma evaluated each year in these practices is 70, the estimated proportion of ‘success’ is 30%, and the estimated intraclass correlation coefficient (ICC) is 0.025 (which is consistent with ICC values reported for primary care research) [1]. To estimate the minimal clinically significant change for this trial, we conducted a survey of practitioners which determined that a 15% absolute change in preventer treatment was clinically important. Using the above values (cluster size = 70, ICC = 0.025, proportion of ‘success’ in control arm = 30%, minimal clinically important improvement = + 15%, that is, proportion of success in intervention arm=45%) and the approach of Hayes and Bennett [2], we determined 11 clusters per arm (or 22 practices ) would provide us with more than 90% power, setting an alpha of 0.05. This power suggests our sample size is robust.

**Design Justification:** Based on recommendations by Donner, we will not use a matched pair design because of lack of baseline information on the primary outcome, rate of preventive therapy in practices [3-4]. Although our project intervention has 2 components (pathway and CDM professional training), we have chosen not to use a factorial study design because these components will be highly interwoven, and, we anticipate, synergistic. A review of factorial studies highlights that if synergy between interventions occurs [5], factorial design can result in inadequate power to detect differences between

interventions.

### **References for Sample Size Calculation**

1. Adams G, Gulliford MC, Ukoumunne OC, Eldridge S, Chinn S, Campbell MJ. Patterns of intra-cluster correlation from primary care research to inform study design and analysis. *J Clin Epidemiol.* 2004;57(8):785–794. PMID: 15485730.
2. Hayes RJ, Bennett S. Simple sample size calculation for cluster-randomized trials. *Int J Epidemiol.* 1999;28(2):319–326. PMID: 10342698.
3. Klar N, Donner A. Current and future challenges in the design and analysis of cluster randomization trials. *Stat Med.* 2001;20(24):3729–3740. PMID: 11782029.
4. Donner A. The role of cluster randomization trials in health research. URL: <http://www.newton.ac.uk/programmes/DAE/seminars/2011081514001.pdf>. (Archived by WebCite® at <http://www.webcitation.org/6eVpa0bOU>)
5. Byth K, Gebski V. Factorial designs: a graphical aid for choosing study designs accounting for interaction. *Clin Trials.* 2004;1(3):315–325. PMID: 16279257.
