# Supplementary material for: Primary Care Pathway for Childhood Asthma: Protocol for a Randomized Cluster-Controlled Trial
Source: PubMed Central journal article supplement (PMC4804104; doi:10.2196/resprot.5261), 2016-03-08
Supplement: resprot_v5i1e37_app2.pdf [file resprot_v5i1e37_app2.pdf]

We estimate that approximately 60% of patients will be evaluated by their practitioner in both the baseline and follow-up time periods. The remaining patients will be analyzed in only the baseline or follow-up period but not the other. This asymmetry requires a consistent method for classifying ‘baseline’ effects for both pathway and control arms. We will use the method outlined below:

|                | Patient Evaluated In This Time Period |           | Interpretation S vs. NS |
|----------------|---------------------------------------|-----------|-------------------------|
|                | Baseline                              | Follow-up |                         |
| Both           | Y                                     | Y         | S                       |
|                | N                                     | Y         | S                       |
|                | Y                                     | N         | NS                      |
| Baseline Only  | Y                                     | -         | S                       |
|                | N                                     | -         | NS                      |
| Follow-up Only | -                                     | Y         | S                       |
|                | -                                     | N         | NS                      |

Y or N = Patient evaluated during this time period

- = Patient **not** evaluated during this time period

Y = Yes, appropriately treated with preventer **in this time period**

N = No, **not** appropriately treated with preventer **in this time period**

S = Success, appropriately treated with preventer **overall**

NS = Non-Success, **not** appropriately treated with preventer **overall**
